# Supplementary material
Source: PubMed Central journal article supplement (PMC1779707)

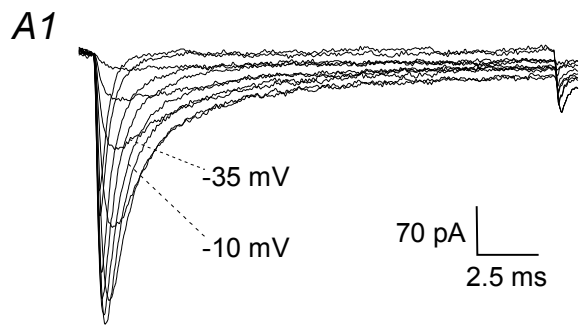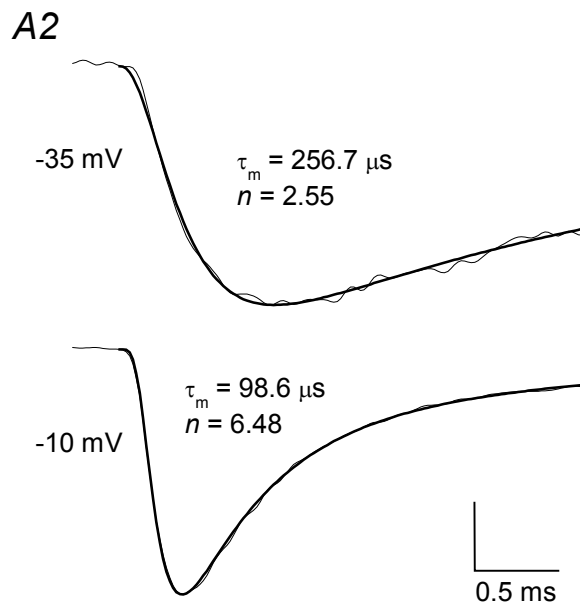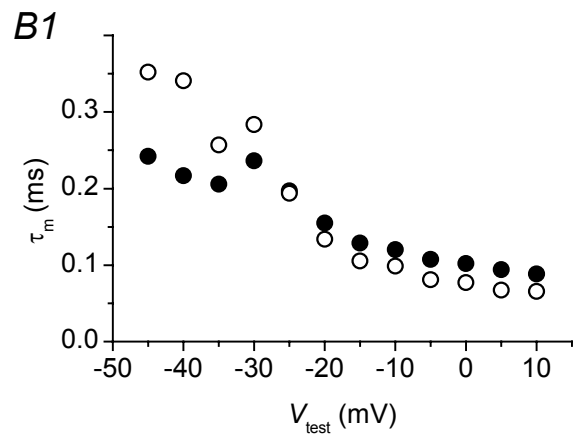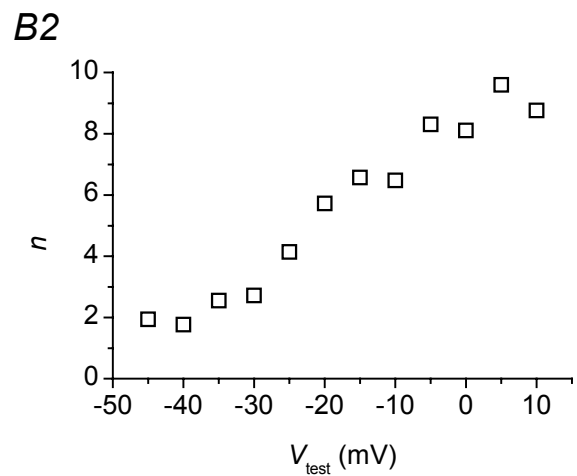

Supplemental Fig. A

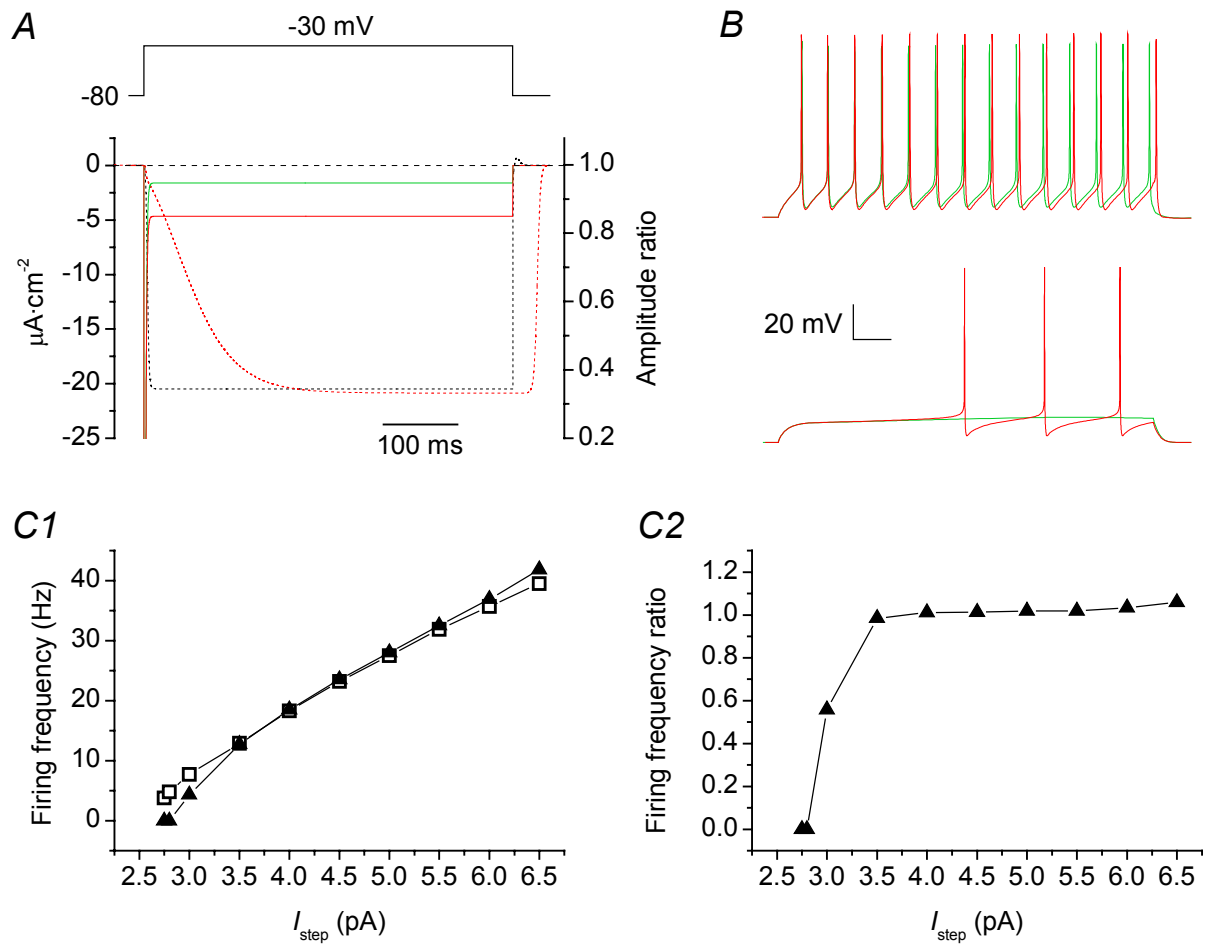

Supplemental Fig. B

Supplement: jphysiol_2006.106682_1.pdf [file jphysiol_2006.106682_1.pdf]

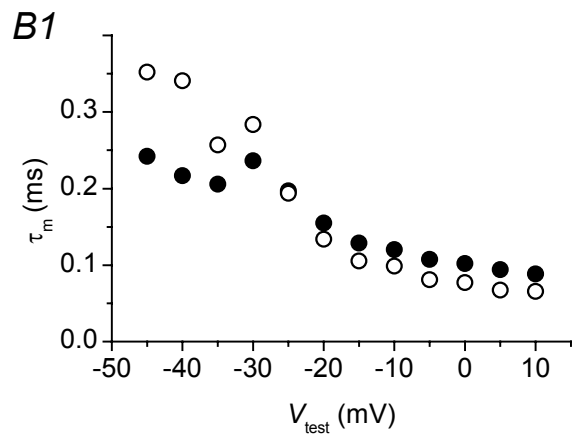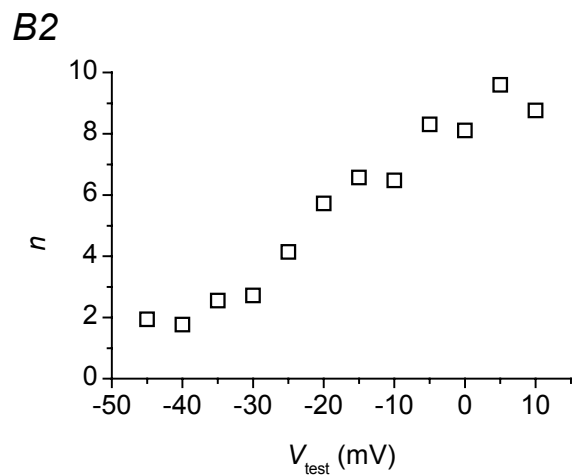

Supplemental Fig. A

Supplement: tjp0573-0083-SFig1.pdf [file tjp0573-0083-SFig1.pdf]



Supplemental Fig. B

Supplement: tjp0573-0083-SFig2.pdf [file tjp0573-0083-SFig2.pdf]
